# Supplementary material for: Digital soil mapping of lithium in Australia
Source: Copernicus journal article supplement (doi:10.5194/essd-15-2465-2023), 2023-06-14
Supplement: Supplementary file 1 [file essd-15-2465-2023-supplement.pdf]

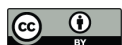

*Supplement of*

## **Digital soil mapping of lithium in Australia**

**Wartini Ng et al.**

*Correspondence to:* Wartini Ng ([wartini.ng@sydney.edu.au](mailto:wartini.ng@sydney.edu.au))

The copyright of individual parts of the supplement might differ from the article licence.

Table S1. Pearson correlation coefficients (*r*) of Lithium and other geochemical properties across TOS and BOS. Data source: de Caritat & Cooper (2011) and Main et al. (2019).

| Property | Li - TOS | Li - BOS | Property | Li - TOS | Li - BOS | Property | Li - TOS | Li - BOS |
|----------|----------|----------|----------|----------|----------|----------|----------|----------|
| Ag       | 0.08**   | 0.04     | Ga       | 0.69***  | 0.64***  | Rb       | 0.66***  | 0.61***  |
| Al       | 0.74***  | 0.69***  | Gd       | 0.59***  | 0.49***  | Sb       | 0.10***  | 0.10***  |
| As       | 0.18***  | 0.21***  | Ge       | 0.16***  | 0.15***  | Sc       | 0.57***  | 0.50***  |
| Au       | 0.05     | 0.08**   | Hf       | 0.31***  | 0.29***  | Se       | 0.26***  | 0.19***  |
| B        | 0.21***  | 0.22***  | Hg       | 0.07*    | 0.15***  | Sm       | 0.60***  | 0.50***  |
| Ba       | 0.35***  | 0.27***  | Ho       | 0.57***  | 0.47***  | Sn       | 0.12***  | 0.13***  |
| Be       | 0.61***  | 0.65***  | In       | 0.17***  | 0.38***  | Sr       | 0.21***  | 0.17***  |
| Bi       | 0.09**   | 0.30***  | K        | 0.49***  | 0.46***  | Tb       | 0.58***  | 0.47***  |
| Ca       | 0.09***  | 0.08**   | La       | 0.53***  | 0.44***  | Te       | 0.06*    | 0.04     |
| Cd       | 0.12***  | 0.03     | Lu       | 0.26***  | 0.24***  | Th       | 0.37***  | 0.36***  |
| Ce       | 0.53***  | 0.42***  | Mg       | 0.43***  | 0.33***  | Tl       | 0.57***  | 0.52***  |
| Co       | 0.41***  | 0.27***  | Mn       | 0.34***  | 0.24***  | Tm       | 0.36***  | 0.30***  |
| Cr       | 0.14***  | 0.10***  | Mo       | 0.12***  | 0.05     | U        | 0.39***  | 0.20***  |
| Cs       | 0.68***  | 0.62***  | Na       | 0.15***  | 0.20***  | V        | 0.28***  | 0.24***  |
| Cu       | 0.39***  | 0.18***  | Nb       | 0.14***  | 0.15***  | W        | 0.01     | 0.01     |
| Dy       | 0.59***  | 0.49***  | Nd       | 0.60***  | 0.49***  | Y        | 0.56***  | 0.46***  |
| Er       | 0.58***  | 0.48***  | Ni       | 0.35***  | 0.25***  | Zn       | 0.42***  | 0.33***  |
| Eu       | 0.58***  | 0.47***  | Pb       | 0.09***  | 0.12***  | Zr       | 0.33***  | 0.30***  |
| Fe       | 0.36***  | 0.30***  | Pr       | 0.58***  | 0.47***  |          |          |          |

\*\*\* Correlation is significant at the 0.001 level

\*\* Correlation is significant at the 0.05 level

\* Correlation is significant at the 0.01 level

## Reference

- de Caritat, P. and Cooper, M.: National Geochemical Survey of Australia: The Geochemical Atlas of Australia. Record 2011/020, Geoscience Australia [dataset], <http://dx.doi.org/10.11636/Record.2011.020>, 2011.
- Main, P. T., Bastrakov, E. N., Wygralak, A. S., and Khan, M.: Northern Australia Geochemical Survey: Data Release 2 – Total (coarse fraction), Aqua Regia (coarse and fine fraction), and Fire Assay (coarse and fine fraction) element contents, Geoscience Australia, Canberra. [dataset], <http://dx.doi.org/10.11636/Record.2019.002>, 2019.
